# Supplementary material for: A single dose of 20-mg of ostarine is detectable in hair
Source: publisher site journal article supplement (doi:10.1515/cclm-2025-0633), 2025-06-16
Supplement: Supplementary file 1 [file j_cclm-2025-0633_suppl_002.docx]

**Supplementary figures**

**Supplemental Figure S1. Capsules ingested by the athlete.**

**Supplemental Figure S2. Chromatogram of blank hair spiked with 0.05 pg/mg (LOQ).**

**Supplemental Figure S3. Chromatogram of the last segment (E: 1 cm, 9.1 mg) of the father’s hair.**
